# Supplementary material
Source: PubMed Central journal article supplement (PMC6464002)
Supplement: Supp_Data.pdf [file Supp_Data.pdf]

## Supplementary Data

SUPPLEMENTARY TABLE S1. MULTILEVEL MULTIVARIABLE  
LOGISTIC REGRESSION PREDICTING PHYSICAL ACTIVITY  
AND FITNESS PARAMETER ESTIMATES AND MODEL  
FIT FOR CARDIA (1985–2005)

| <i>A. Physical Activity</i> |                                |                |
|-----------------------------|--------------------------------|----------------|
| <i>Variable</i>             | <i>Parameter estimate (SE)</i> | <i>P value</i> |
| Black men $R^2=0.12^a$      |                                |                |
| Age                         | -7.5 (1.3)                     | <0.0001        |
| Smoking status              |                                | <0.0001        |
| Never                       | 21.9 (17.1)                    |                |
| Current                     | -25.7 (17.8)                   |                |
| Former                      | 1.0 (reference)                |                |
| Metabolic risk status       |                                | <0.0001        |
| Normal risk                 | 98.9 (16.4)                    |                |
| Elevated risk               | 1.0 (reference)                |                |
| Time                        | -11.1 (2.6)                    | <0.0001        |
| Time <sup>2</sup>           | 0.28 (0.1)                     | 0.03           |
| White men $R^2=0.12^a$      |                                |                |
| Age                         | -3.4 (1.1)                     | 0.002          |
| Smoking status              |                                | <0.0001        |
| Never                       | -20.3 (10.6)                   |                |
| Current                     | -58.4 (12.1)                   |                |
| Former                      | 1.0 (reference)                |                |
| Metabolic risk status       |                                | <0.0001        |
| Normal risk                 | 70.8 (12.5)                    |                |
| Elevated risk               | 1.0 (reference)                |                |
| Time                        | -14.0 (2.0)                    | <0.0001        |
| Time <sup>2</sup>           | 0.46 (0.1)                     | <0.0001        |
| Black women $R^2=0.08^a$    |                                |                |
| Age                         | -4.4 (0.7)                     | <0.0001        |
| Smoking status              |                                | <0.0001        |
| Never                       | -24.3 (10.8)                   |                |
| Current                     | -2.0 (11.3)                    |                |
| Former                      | 1.0 (reference)                |                |
| Metabolic risk status       |                                | 0.27           |
| Normal risk                 | 10.1 (9.3)                     |                |
| Elevated risk               | 1.0 (reference)                |                |
| Time                        | -8.0 (1.5)                     | <0.0001        |
| Time <sup>2</sup>           | 0.28 (0.07)                    | <0.0001        |
| White women $R^2=0.10^a$    |                                |                |
| Age                         | -1.5 (0.9)                     | 0.10           |
| Smoking status              |                                | <0.0001        |
| Never                       | -32.7 (8.0)                    |                |
| Current                     | -42.9 (9.2)                    |                |
| Former                      | 1.0 (reference)                |                |
| Metabolic risk status       |                                | <0.0001        |
| Normal risk                 | 78.7 (10.2)                    |                |
| Elevated risk               | 1.0 (reference)                |                |
| Time                        | -14.6 (1.6)                    | <0.0001        |
| Time <sup>2</sup>           | 0.61 (0.09)                    | <0.0001        |

*(continued)*

SUPPLEMENTARY TABLE S1. (CONTINUED)

| <i>B. Fitness</i>        |                 |               |
|--------------------------|-----------------|---------------|
| Black men $R^2=0.48^a$   |                 |               |
| Age                      | 1.1 (0.9)       | 0.22          |
| Smoking status           |                 | <0.0001       |
| Never                    | 16.0 (11.3)     |               |
| Current                  | -26.8 (11.9)    |               |
| Former                   | 1.0 (reference) |               |
| Metabolic risk status    |                 | <0.0001       |
| Normal risk              | 131.1 (11.0)    |               |
| Elevated risk            | 1.0 (reference) |               |
| Time                     | -10.6 (0.4)     | <0.0001       |
| White men $R^2=0.49^a$   |                 |               |
| Age                      | 0.2 (0.9)       | 0.83          |
| Smoking status           |                 | <0.0001       |
| Never                    | 0.7 (8.5)       |               |
| Current                  | -59.5 (9.8)     |               |
| Former                   | 1.0 (reference) |               |
| Metabolic risk status    |                 | <0.0001       |
| Normal risk              | 128.3 (9.9)     |               |
| Elevated risk            | 1.0 (reference) |               |
| Time                     | -9.2 (0.3)      | <0.0001       |
| Black women $R^2=0.43^a$ |                 |               |
| Age                      | -4.6 (0.6)      | <0.0001       |
| Smoking status           |                 | <0.0001       |
| Never                    | 13.4 (9.1)      |               |
| Current                  | -14.8 (9.6)     |               |
| Former                   | 1.0 (reference) |               |
| Metabolic risk status    |                 | <0.0001       |
| Normal risk              | 87.6 (8.0)      |               |
| Elevated risk            | 1.0 (reference) |               |
| Time                     | -7.1 (0.3)      | $\leq 0.0001$ |
| White women $R^2=0.33^a$ |                 |               |
| Age                      | -2.1 (0.8)      | 0.009         |
| Smoking status           |                 | <0.0001       |
| Never                    | 20.6 (7.3)      |               |
| Current                  | -49.4 (8.4)     |               |
| Former                   | 1.0 (reference) |               |
| Metabolic risk status    |                 | <0.0001       |
| Normal risk              | 146.5 (9.6)     |               |
| Elevated risk            | 1.0 (reference) |               |
| Time                     | -6.3 (0.3)      | <0.0001       |

<sup>a</sup> $R^2$  calculated from likelihood tests (1).

CARDIA, Coronary Artery Risk Development in Young Adults; SE, standard error.

### Reference

1. Magee L.  $R^2$  measures based on Wald and likelihood ratio joint significance tests. *The Am Statistician* 1990;44:250–253.
